# Supplementary material
Source: publisher figshare collection journal article supplement (https://acs.figshare.com/ndownloader/files/8253005)

# **Controlled growth of BiOCl with large {010} facets for dye self-photosensitization photocatalytic fuel cells application**

Lei Zhang,<sup>†</sup> Cheng-Gang Niu,<sup>†,\*</sup> Geng-Xin Xie,<sup>‡,\*</sup> Xiao-Ju Wen,<sup>†</sup>  
Xue-Gang Zhang,<sup>†</sup> Guang-Ming Zeng<sup>†</sup>

<sup>†</sup> College of Environmental Science Engineering, Key Laboratory of Environmental Biology Pollution Control, Ministry of Education, Hunan University, Changsha, 410082, China

<sup>‡</sup> Urban Construction and Environmental Engineering, Chongqing University, Chongqing, 400044, China

\*To whom correspondence should be addressed. Tel: +86 731 88823820;

E-mail: cgniu@hnu.edu.cn. xiegengxin@vip.sina.com.

## Figure Caption

**Figure S1** SEM images of RhB/BiOCl: (a) RhB/BiOCl-HNO<sub>3</sub>, and (b) RhB/BiOCl-NH<sub>4</sub>OH.

**Figure S2** Mott-schottky plot of BiOCl-NH<sub>4</sub>OH.

**Figure S3** XRD patterns (a) and XPS spectra (b) of BiOCl-NH<sub>4</sub>OH before and after light irradiation.

**Figure S4** Transient photocurrent responses of BiOCl-001 and BiOCl-NH<sub>4</sub>OH samples in 0.05 M Na<sub>2</sub>SO<sub>4</sub> aqueous solutions under visible light.

**Figure S5** Electrochemical impedance spectroscopy (EIS) of BiOCl samples prepared in different solvent and P25 in DSPFCs.

**Figure S6** J-V and J-JV curves of DSPFCs based on BiOCl-NH<sub>4</sub>OH, BiOCl-001 and P25 photoanodes under visible light irradiation. C<sub>RhB</sub>=10mg/L, 0.05 M Na<sub>2</sub>SO<sub>4</sub> aqueous solutions, pH=2.0.

**Figure S7** Schematic diagram illustrating the process of energy recovery and dye decomposition.

**Figure S8** Color removal efficiency of RhB over BiOCl and P25 photoanodes. C<sub>RhB</sub>=10mg/L, Na<sub>2</sub>SO<sub>4</sub> 0.05 M, pH=2.0.

**Figure S9** Recyclability of BiOCl-NH<sub>4</sub>OH in the photocatalytic fuel cells.

**Figure S1**

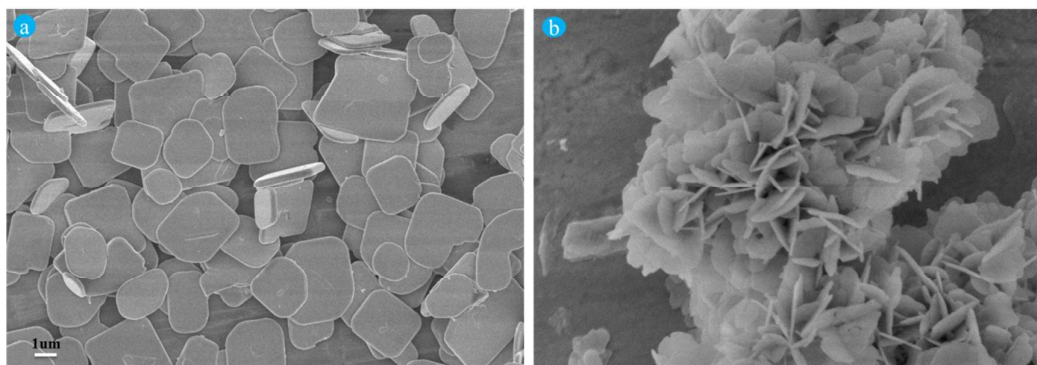

Figure S2

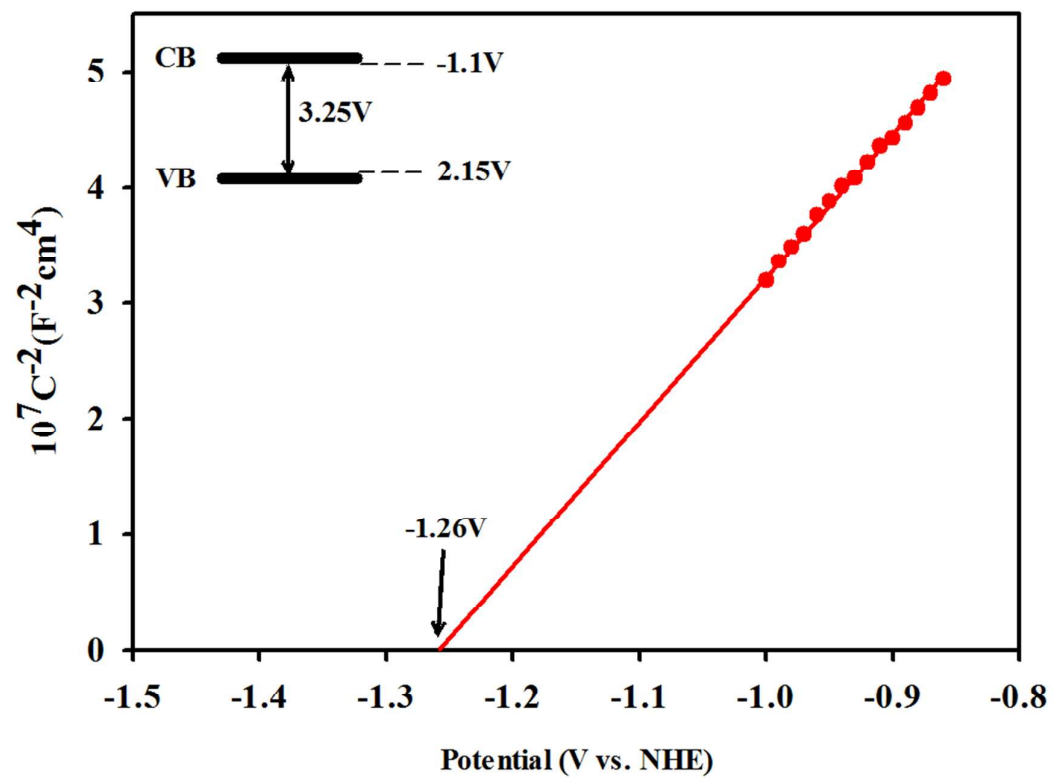

**Figure S3**

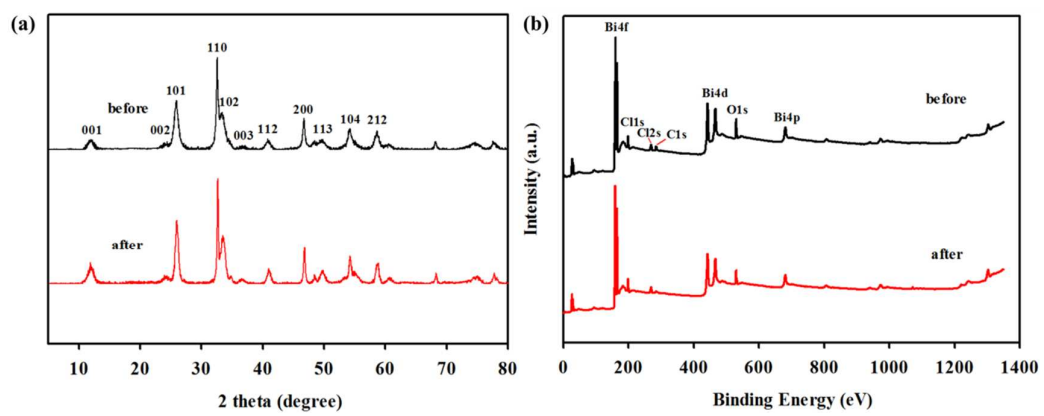

Figure S4

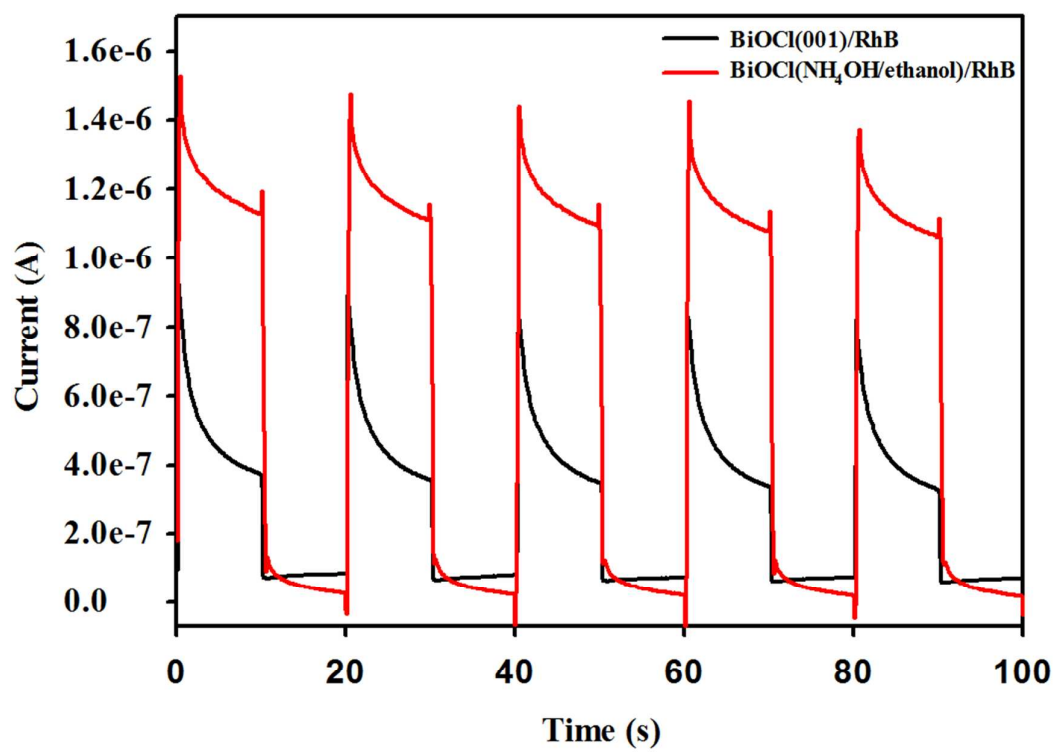

Figure S5

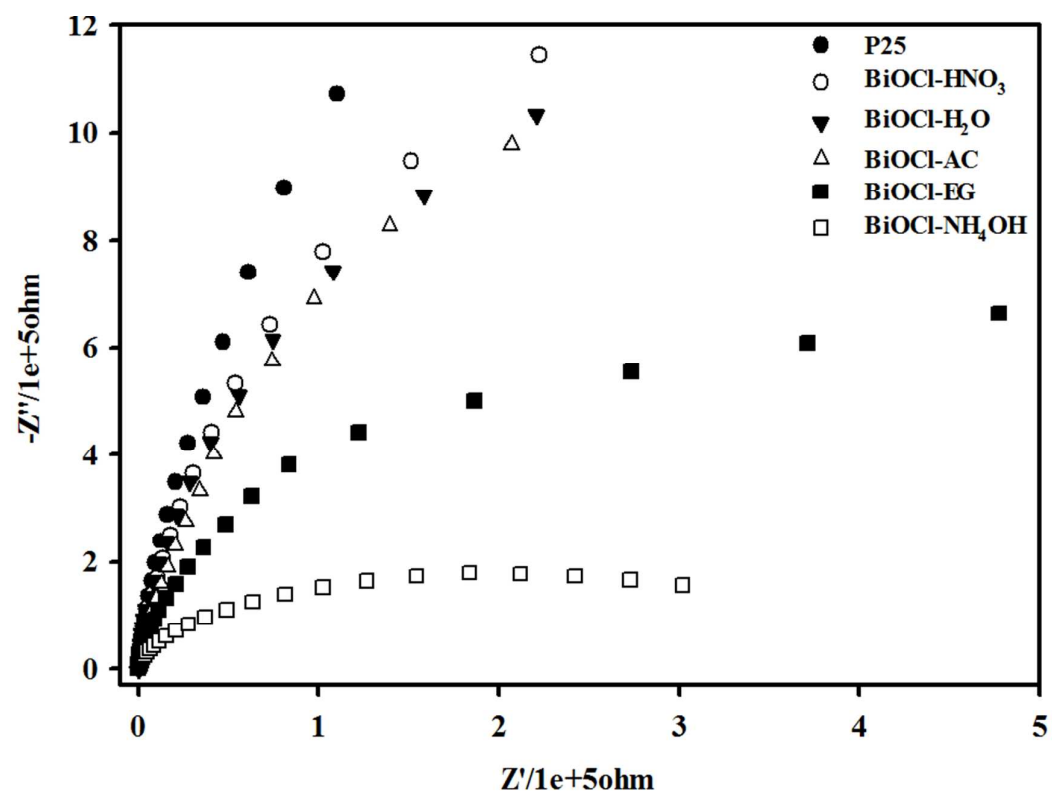

Figure S6

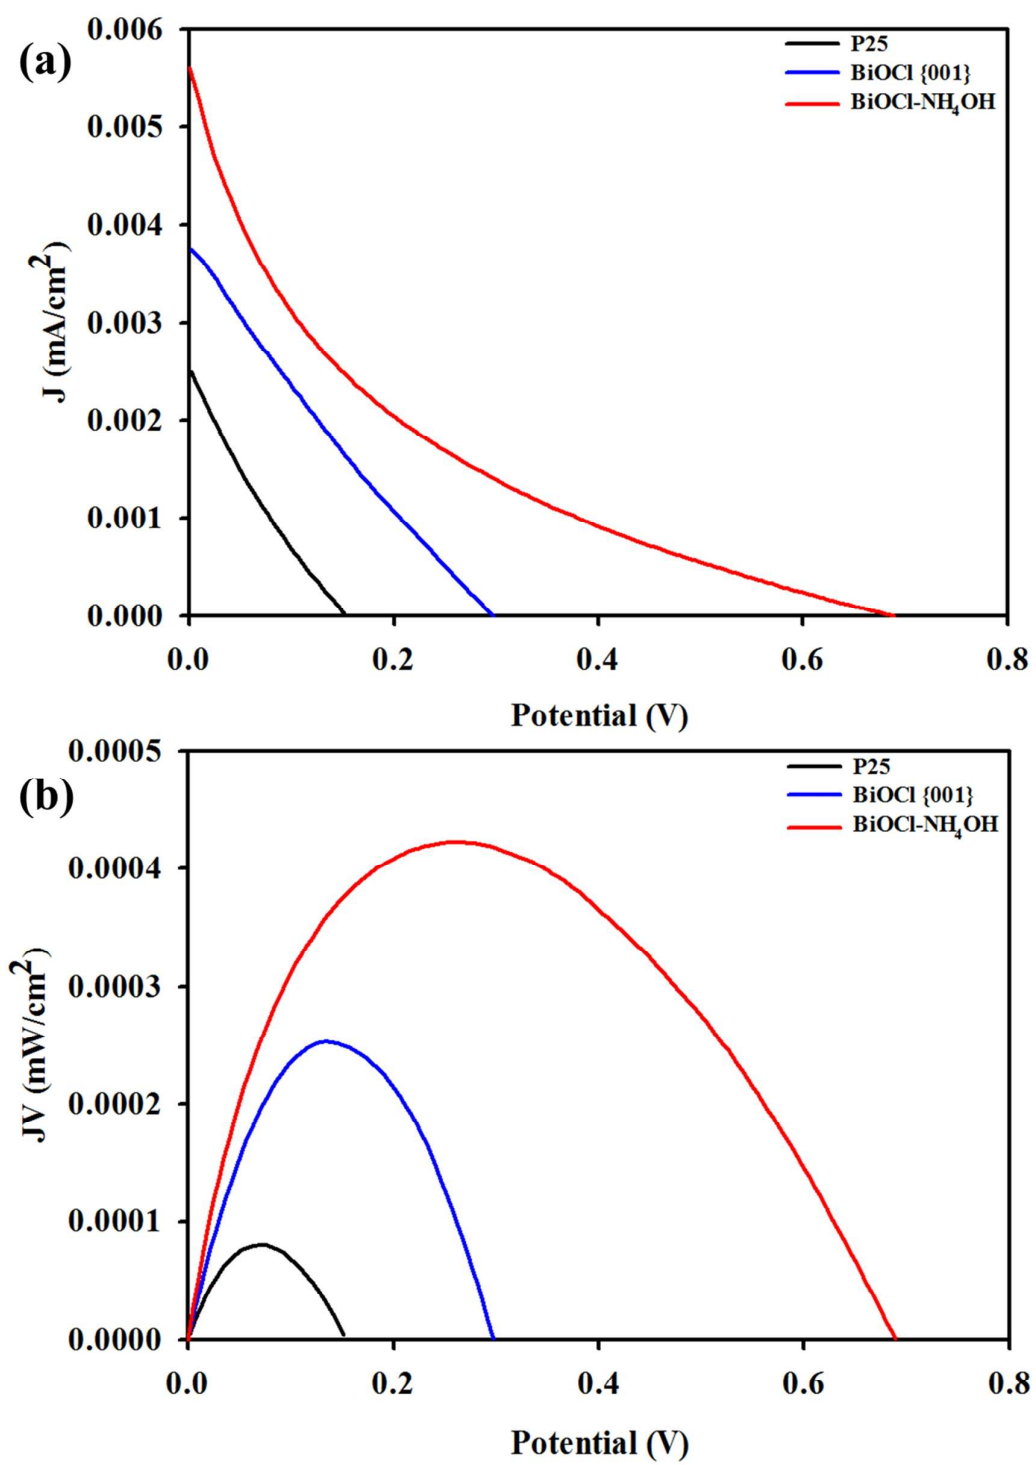



Figure S7

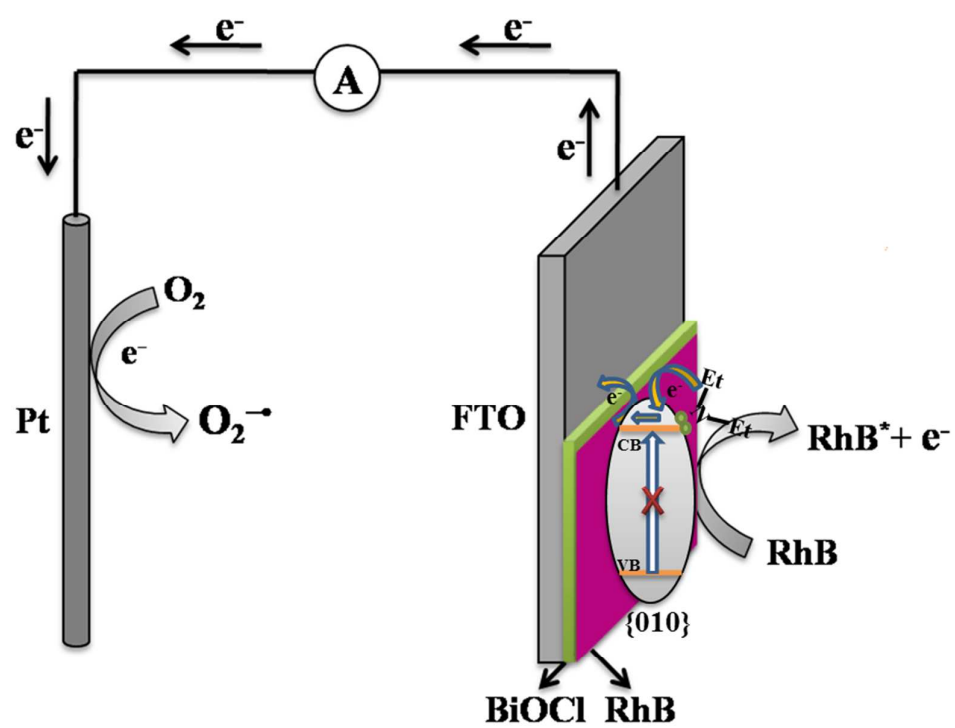

Figure S8

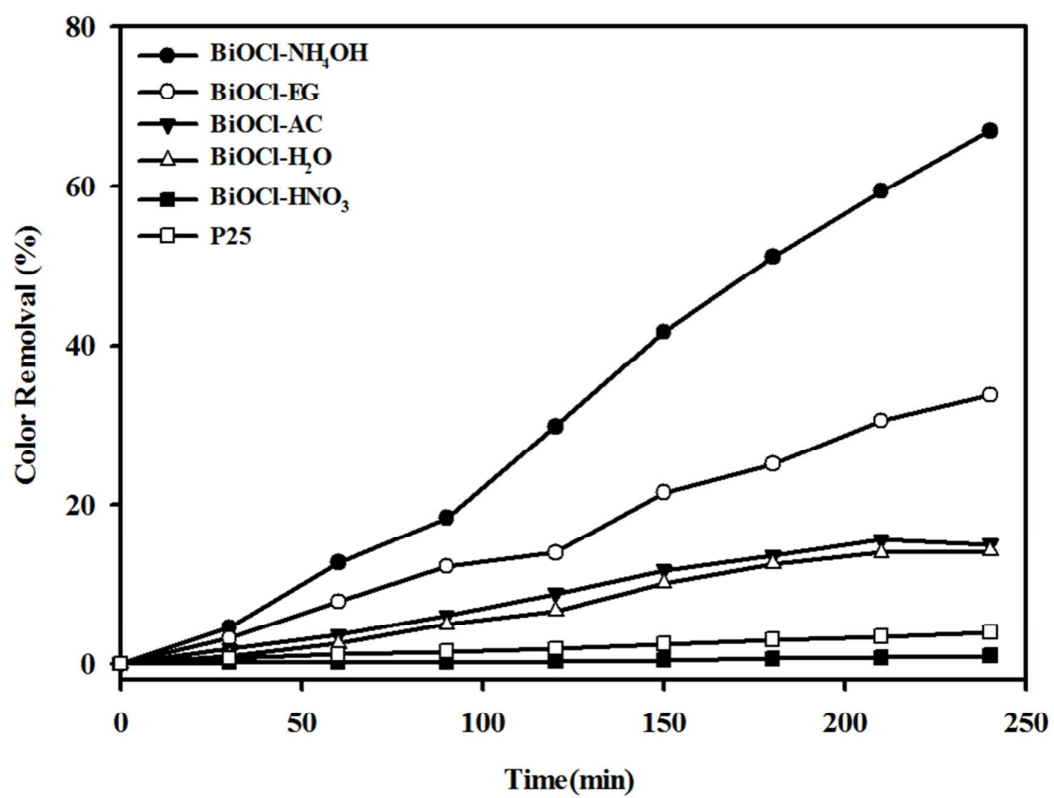

Figure S9

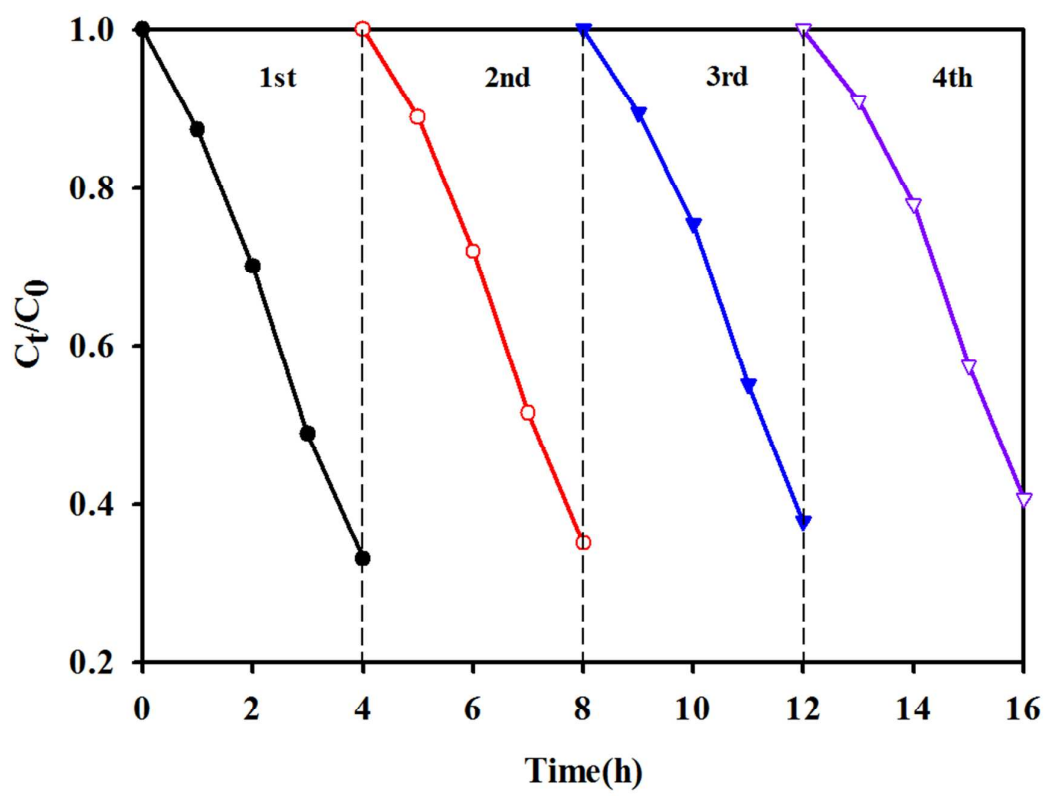

Supplement: Supplementary file 1 [file 8253005]
